# Supplementary material for: Characterization and Functional Analysis of OcomOBP7 in Ophraella communa Lesage
Source: MDPI journal article supplement (doi:10.3390/insects14020190), 2023-02-14
Supplement: s1 [file s1]

# Supplementary Materials:

Table S1: Sequence BLASTX information for *OcomOBP7* in *O. communis*.

| Gene Name | Species Name                    | Acc. number | Identity (%) |
|-----------|---------------------------------|-------------|--------------|
| CforOBP26 | <i>Cylas formicarius</i>        | UNA06110.1  | 44.37        |
| CbowOBP1  | <i>Colaphellus bowringi</i>     | ALR72489.1  | 54.23        |
| MaltOBP4  | <i>Monochamus alternatus</i>    | AHA39269.1  | 50.00        |
| BhorOBP1  | <i>Batocera horsfieldi</i>      | AHA33382.1  | 52.82        |
| XquaOBP8  | <i>Xylotrechus quadripes</i>    | AXO78386.1  | 48.95        |
| AglaOBP14 | <i>Anoplophora glabripennis</i> | ARH65469.1  | 48.59        |
| HaxyOBP7  | <i>Harmonia axyridis</i>        | AVH84914.1  | 43.66        |

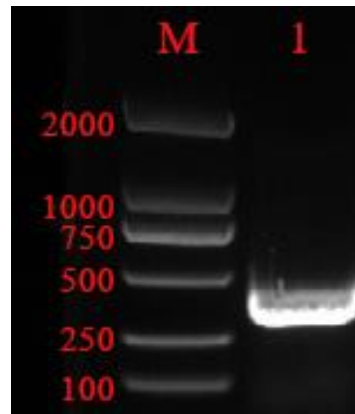

**Figure S1.** PCR product of *OcomOBP7*. Line M: Trans2K DNA Maker; Line 1: PCR product of *OcomOBP7* sequence.

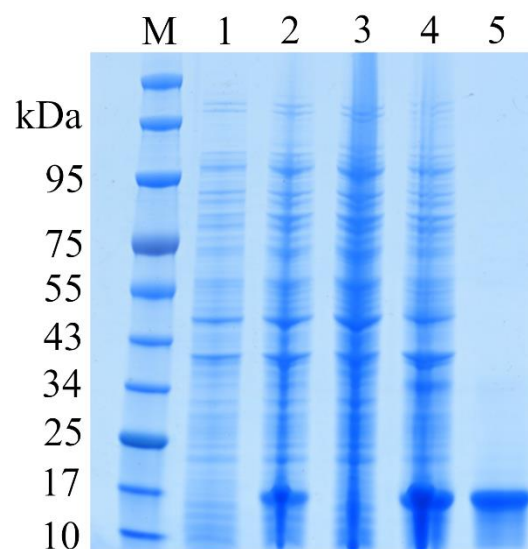

**Figure S2.** SDS-PAGE of expression and purification of *OcomOBP7*. M: molecular weight marker; 1: noninduced pET28a-*OcomOBP7*; 2: induced pET28a-*OcomOBP7*; 3: supernatant of

induced pET28a-OcomOBP7; 4: inclusion body of induced pET28a-OcomOBP7; 5: Purified pET28a-OcomOBP7.

## Protein View

Match to: **OBP7-sequence** Score: 5991

Found in search of K:\qe\BPI\_27182\_OBP\_7.mgf  
Translated in frame 1

NB Matches were also found in other frames indicating a possible frame shift.  
Only matches in frame 1 are shown in this report

Show frame

1 ▼

Nominal mass ( $M_r$ ): **15746**; Calculated pI value: **7.48**

NCBI BLAST search of **OBP7-sequence** against nr

Unformatted [sequence string](#) for pasting into other applications

Fixed modifications: Carbamidomethyl (C)

Variable modifications: Gln->pyro-Glu (N-term Q), Oxidation (M)

Cleavage by Trypsin: cuts C-term side of KR unless next residue is P

Sequence Coverage: **82%**

Matched peptides shown in **Bold Red**

1 MKWFLGICI YFIMEDVWCA VTEKQLNATK **KLVRNSCTAK SKVAPEVIDA**  
51 **MHKGDFSEGQ** CYIQICINNTY KLIKPDGSFD WEGGVAAVNA NLPSNLAVAA  
101 **AASIKNCKDS LKNKSDKCMG** AAEVAMCIYN TDPPTYFLP\_

**Figure S3.** Results of mass spectrometry identification of OcomOBP7.
